# Supplementary material for: Patient priorities in herpes simplex keratitis
Source: PubMed Central journal article supplement (PMC6528774; doi:10.1136/bmjophth-2018-000177), 2019-04-25
Supplement: bmjophth-2018-000177supp002.pdf [file bmjophth-2018-000177supp002.pdf]

**Thank you for agreeing to take part in this questionnaire.**

\* 1. Please rank the following areas of research in Herpes Simplex Keratitis by order of importance (1-9). 9 being the most important, and 1 being the least important.

|                      |                                                           |
|----------------------|-----------------------------------------------------------|
| <input type="text"/> | How quickly the infection can be treated.                 |
| <input type="text"/> | The frequency of hospital visits.                         |
| <input type="text"/> | The need for long term treatment.                         |
| <input type="text"/> | When there is failure to treat the infection.             |
| <input type="text"/> | Uncertainties about disease resistance to treatment.      |
| <input type="text"/> | Risk factors for developing infection.                    |
| <input type="text"/> | Risk factors for recurrence of infection.                 |
| <input type="text"/> | Impact of the disease on quality of life.                 |
| <input type="text"/> | Developing tests to guide our treatment more effectively. |

For each of the following topics, please explain any specific points you would like us to research.

\* 2. Regarding each topic area, please explain any specific points you would like us to research.

How quickly the infection can be treated.

The frequency of hospital visits.

The need for long term treatment.

When there is failure to treat the infection.

Uncertainties regarding disease resistance to treatment.

Risk factors for developing the infection.

Risk factors for recurrence of infection.

Impact of the disease on quality of life.

Developing tests to guide treatment more effectively.

Other:
